# Supplementary material for: RNA‐binding protein RBM24 represses colorectal tumourigenesis by stabilising PTEN mRNA
Source: PubMed Central journal article supplement (PMC8506628; doi:10.1002/ctm2.383), 2021-10-12

## Supplementary Figure S1

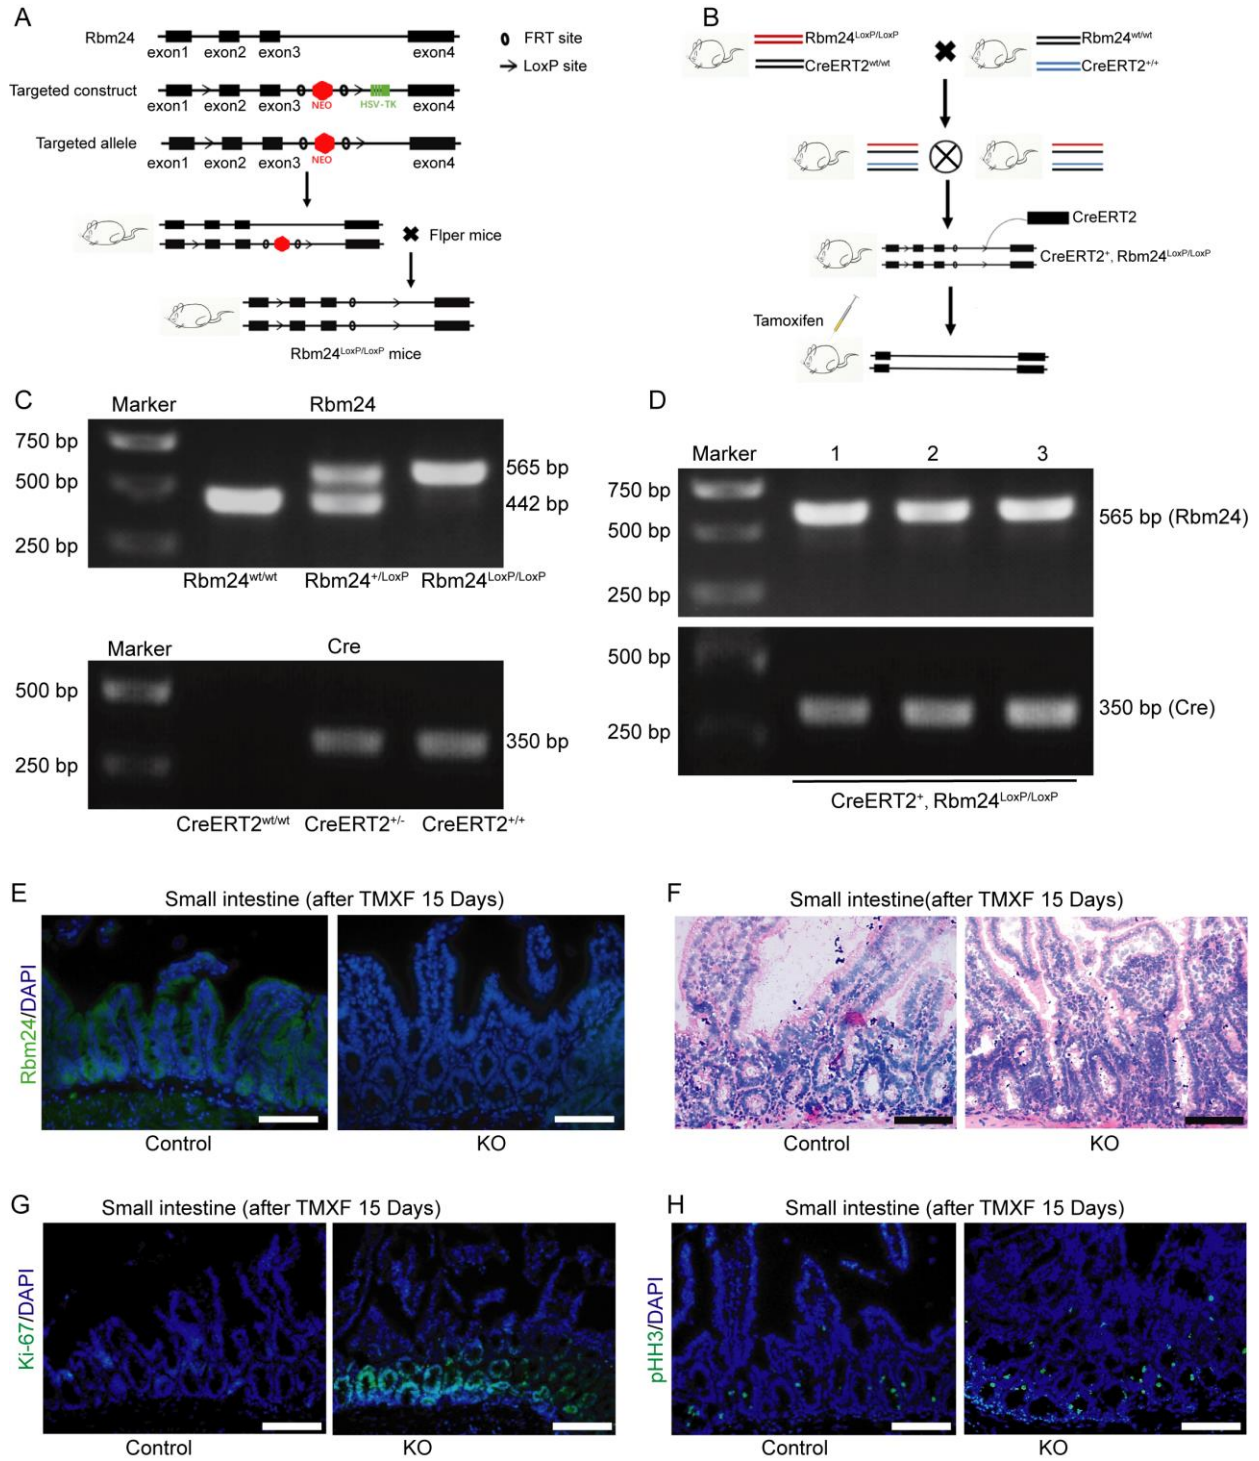

## Supplementary Figure S2

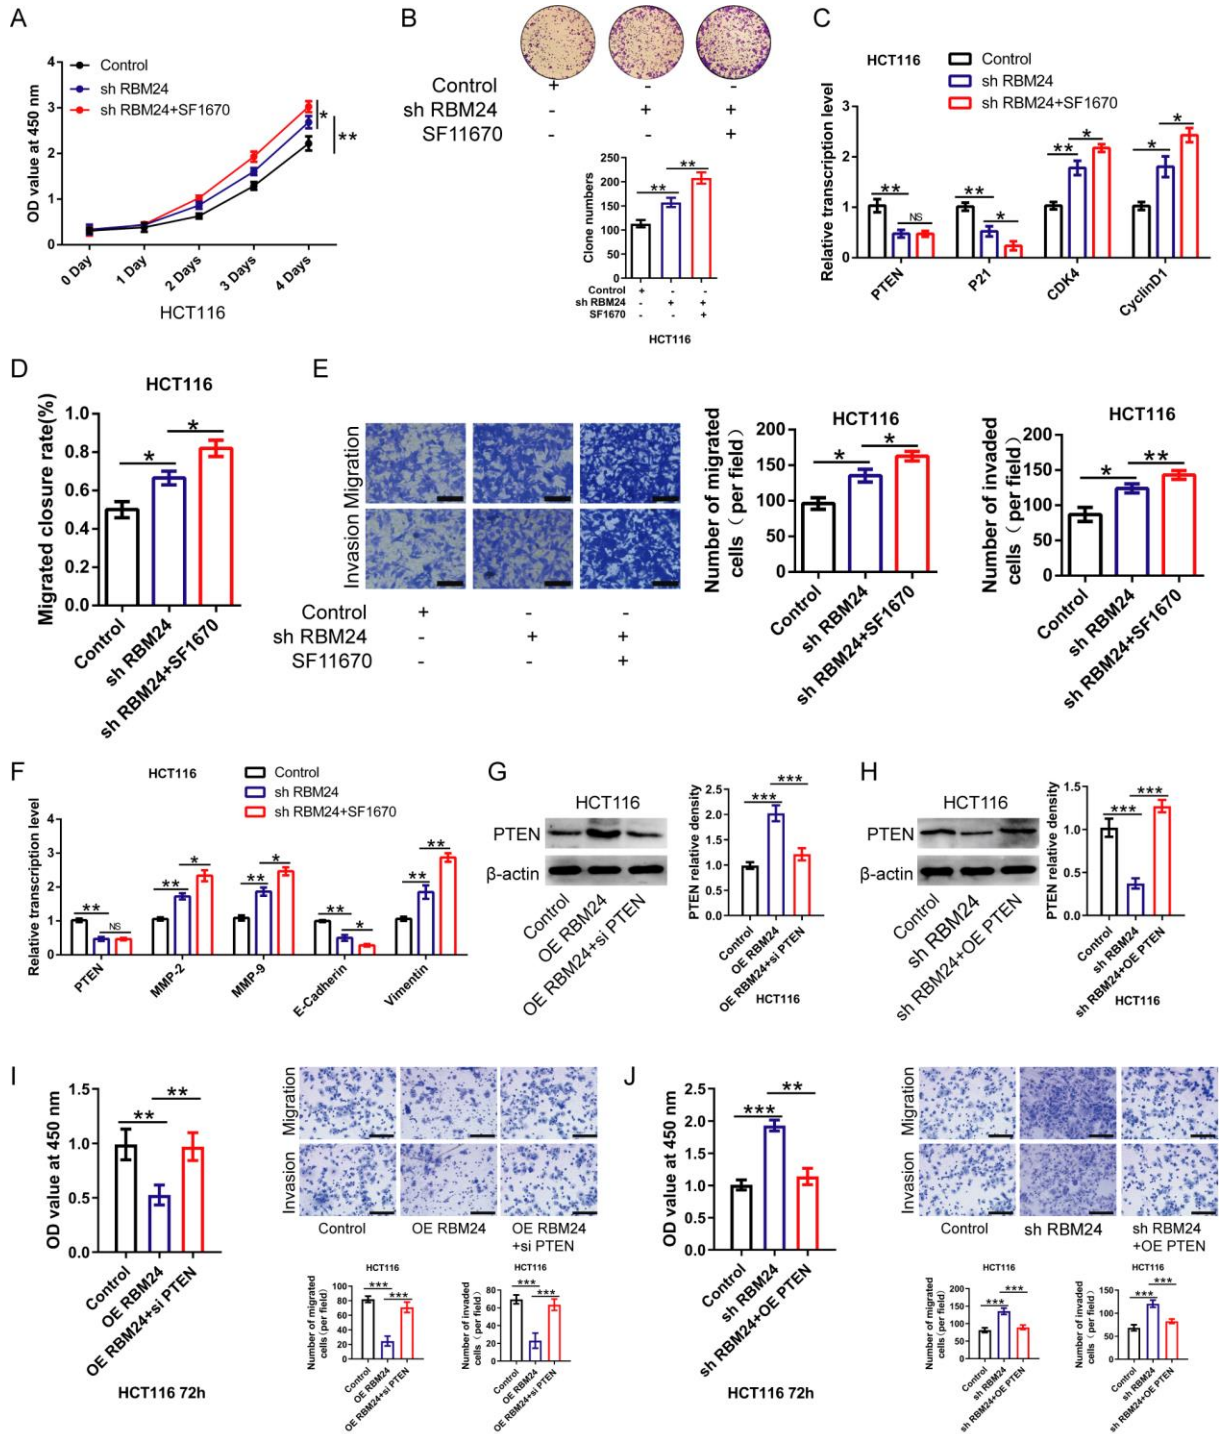

# Supplementary Figure S3

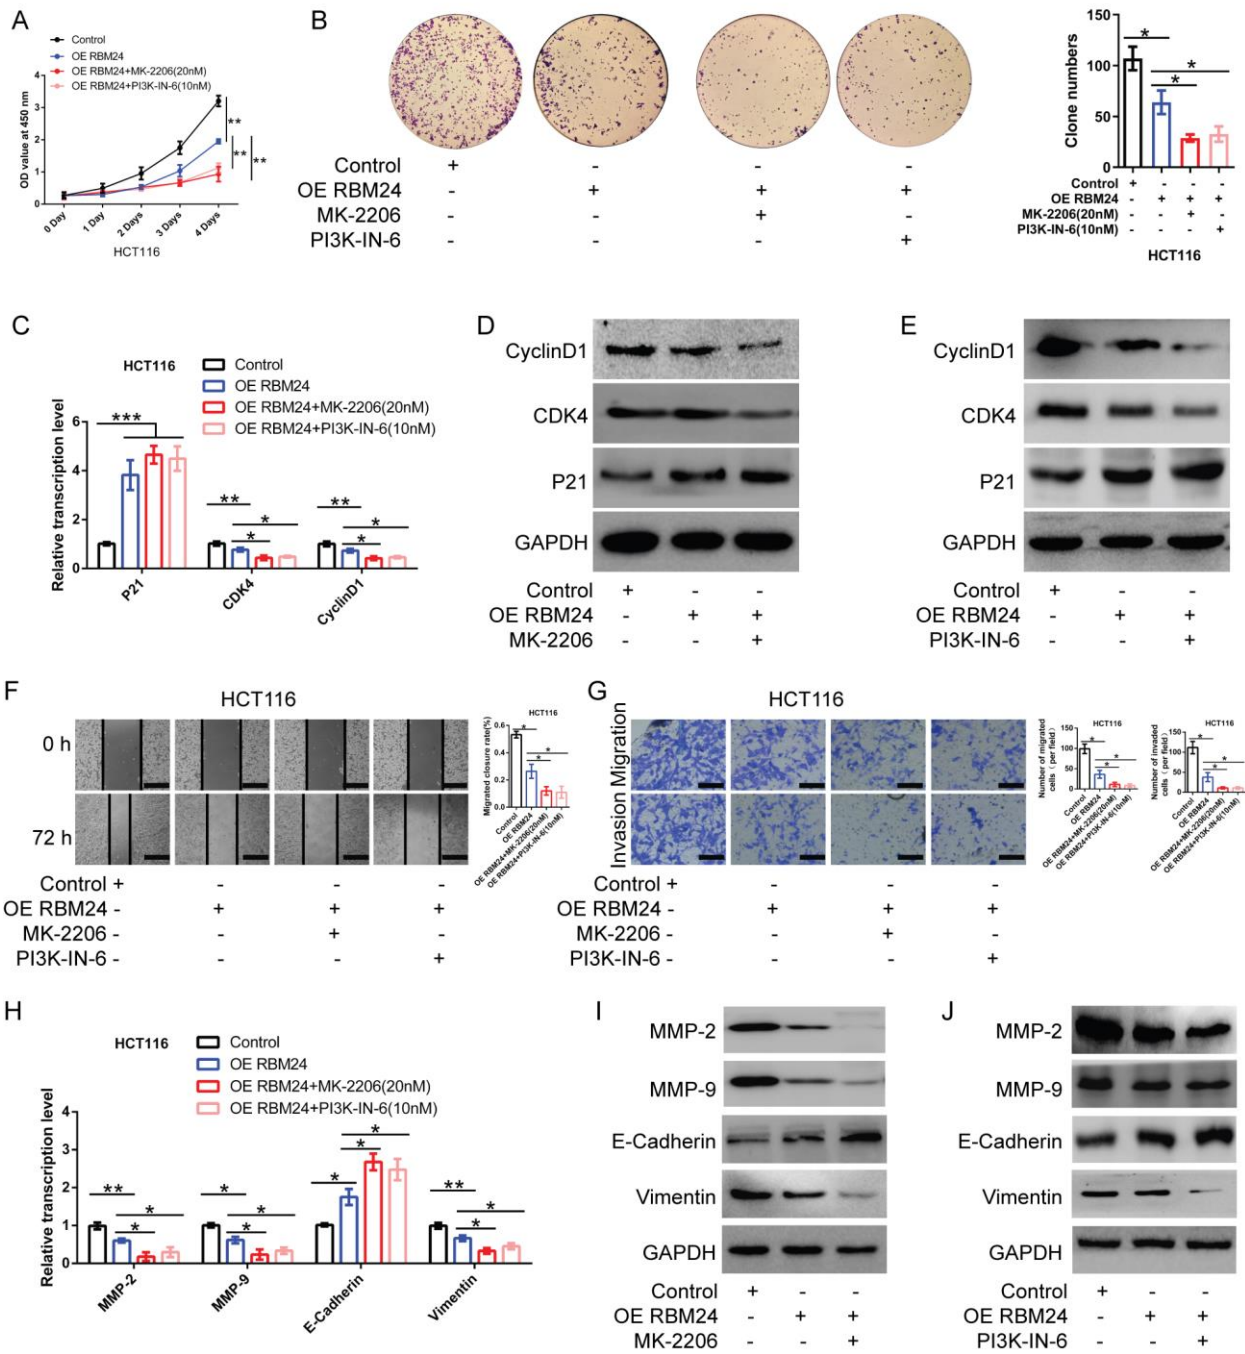

## Supplementary Figure S4

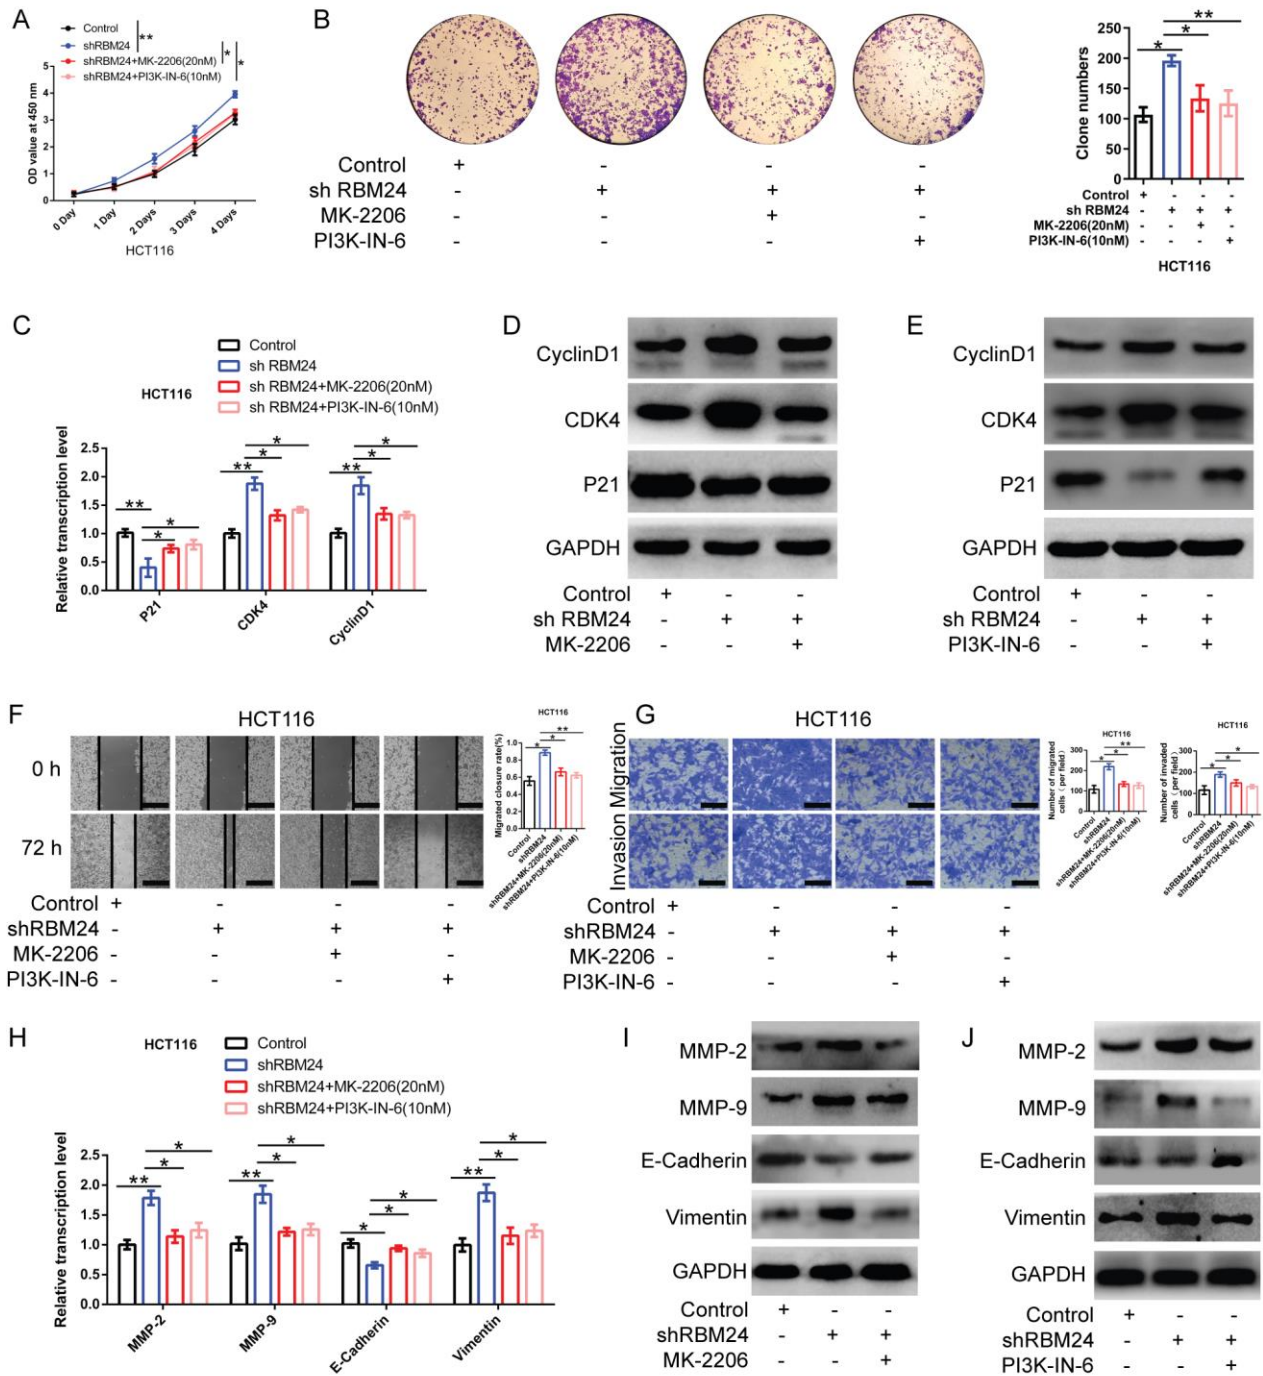

## Supplementary Figure S5

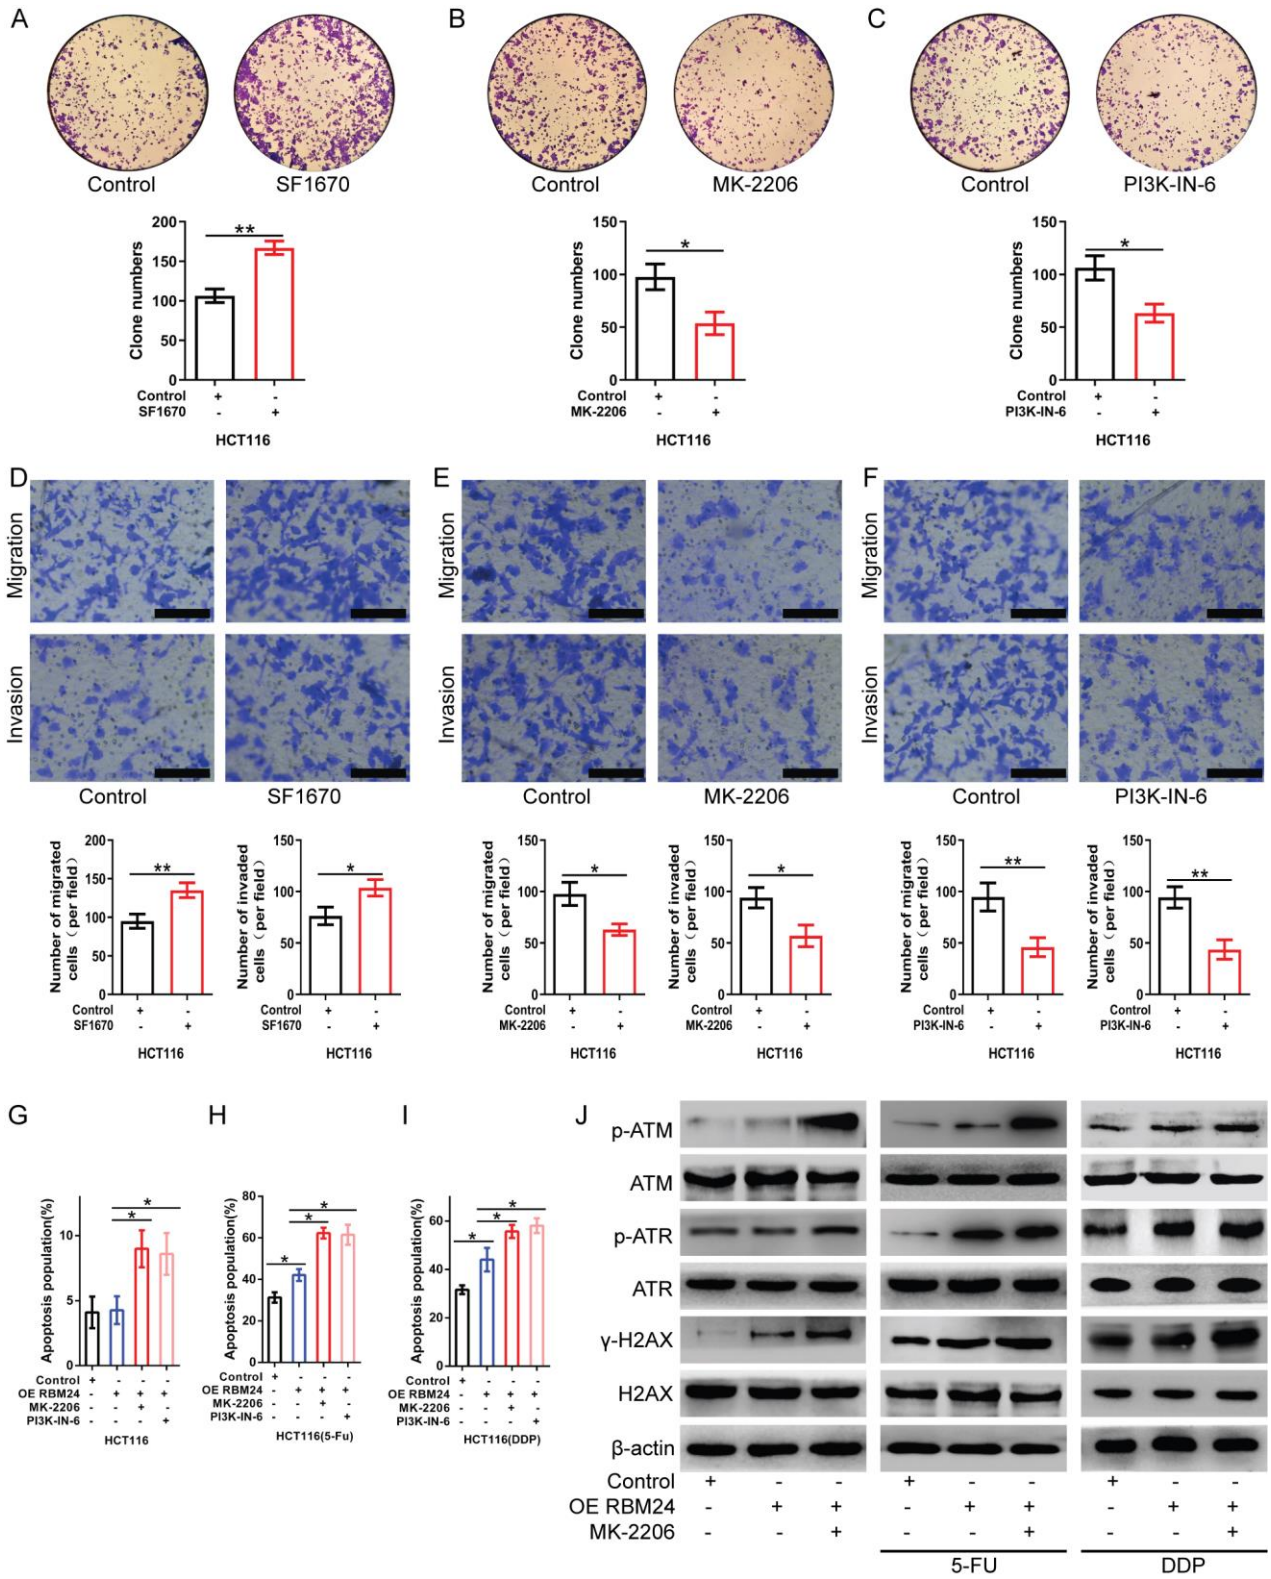

# Supplementary Figure S6

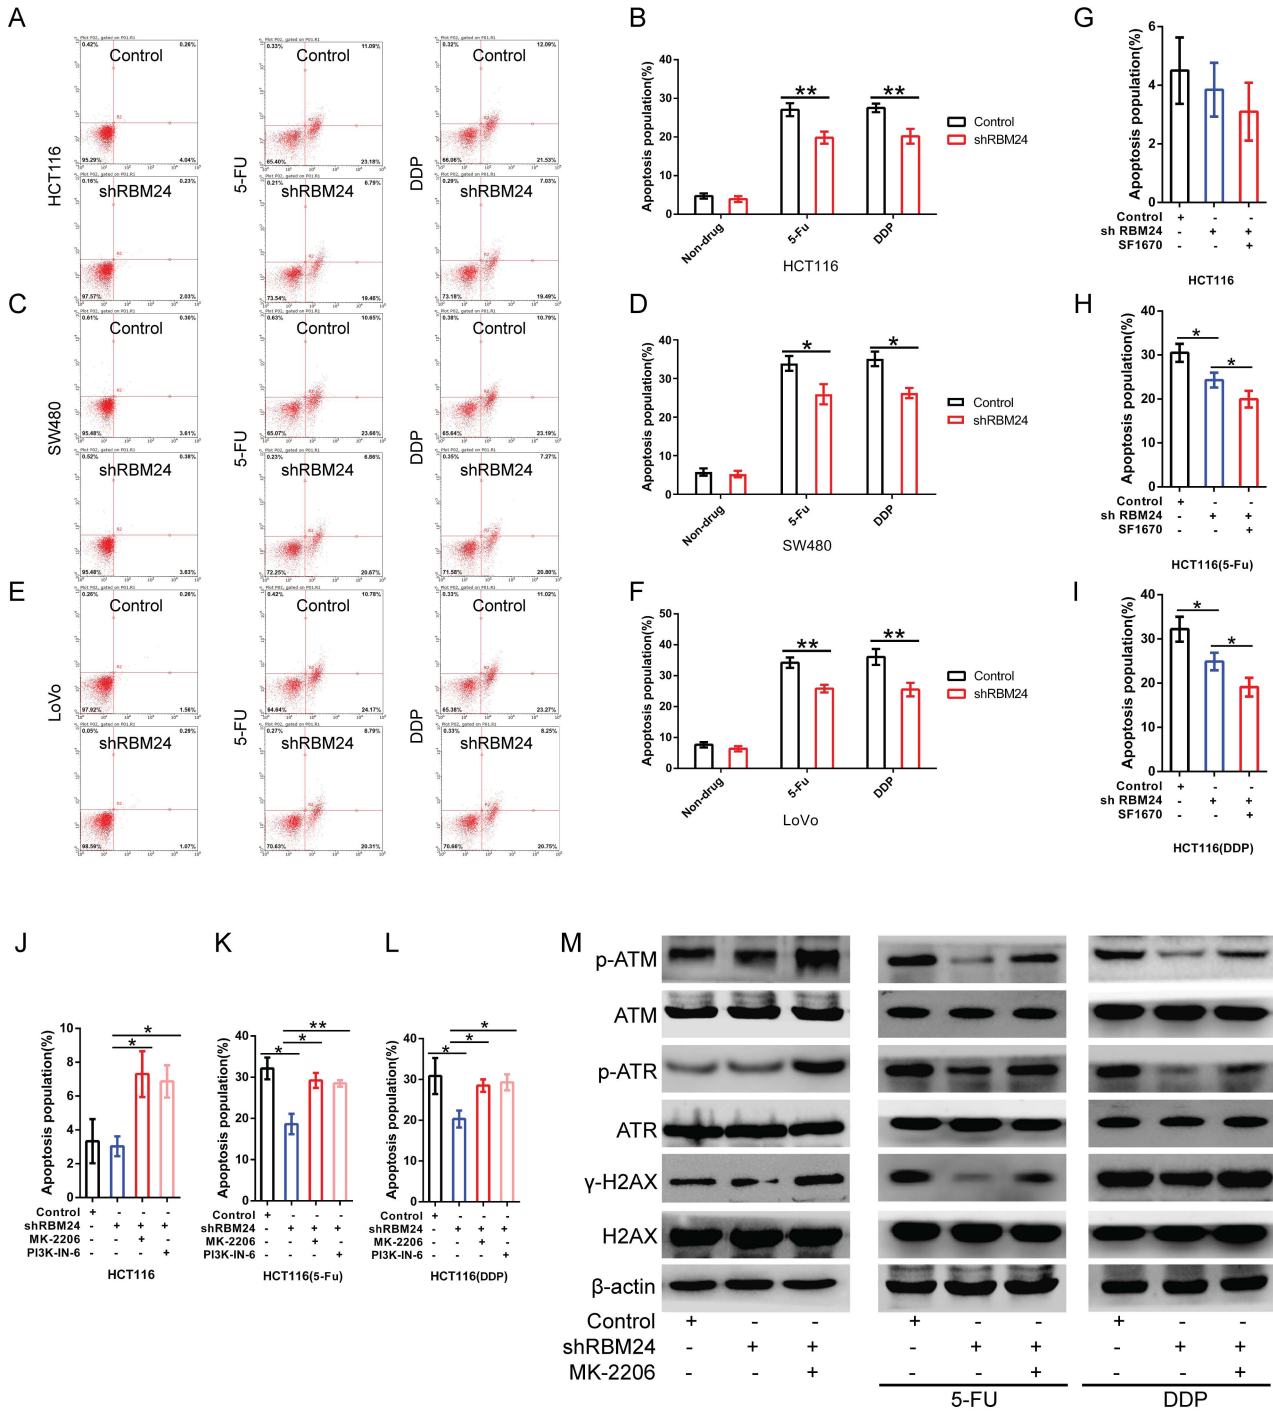

## Supplementary Figure S7

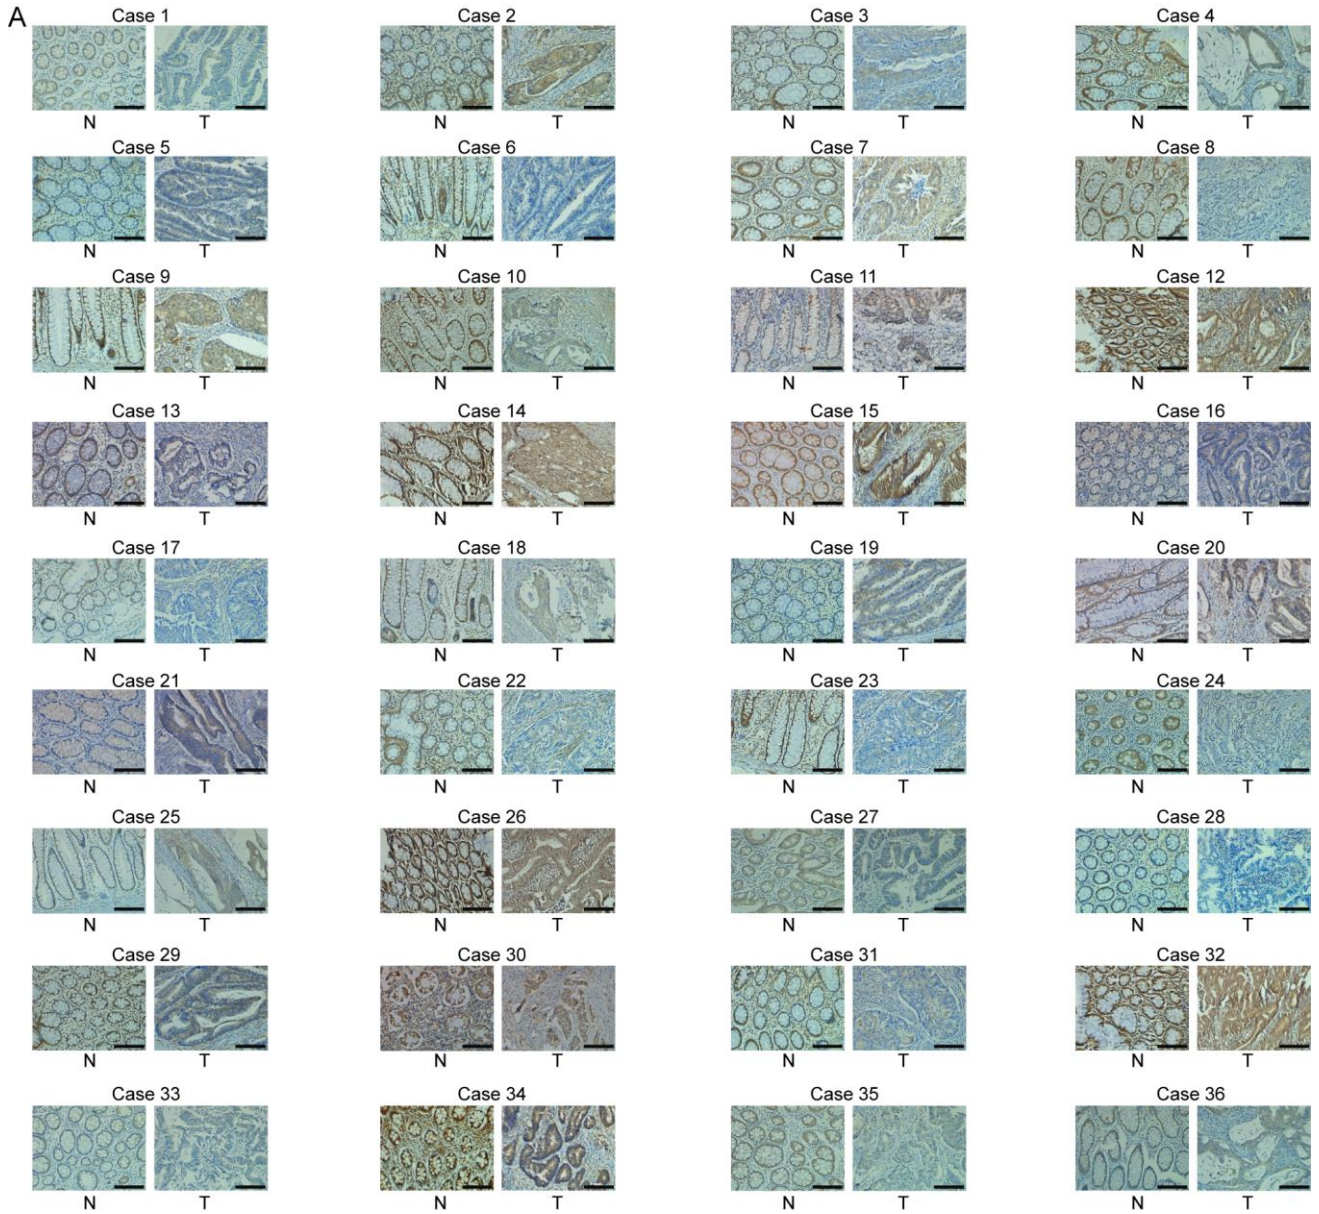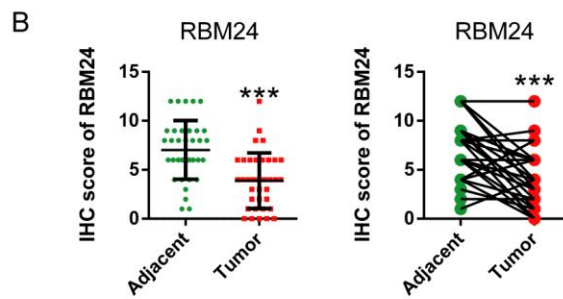

# Supplementary Figure S8

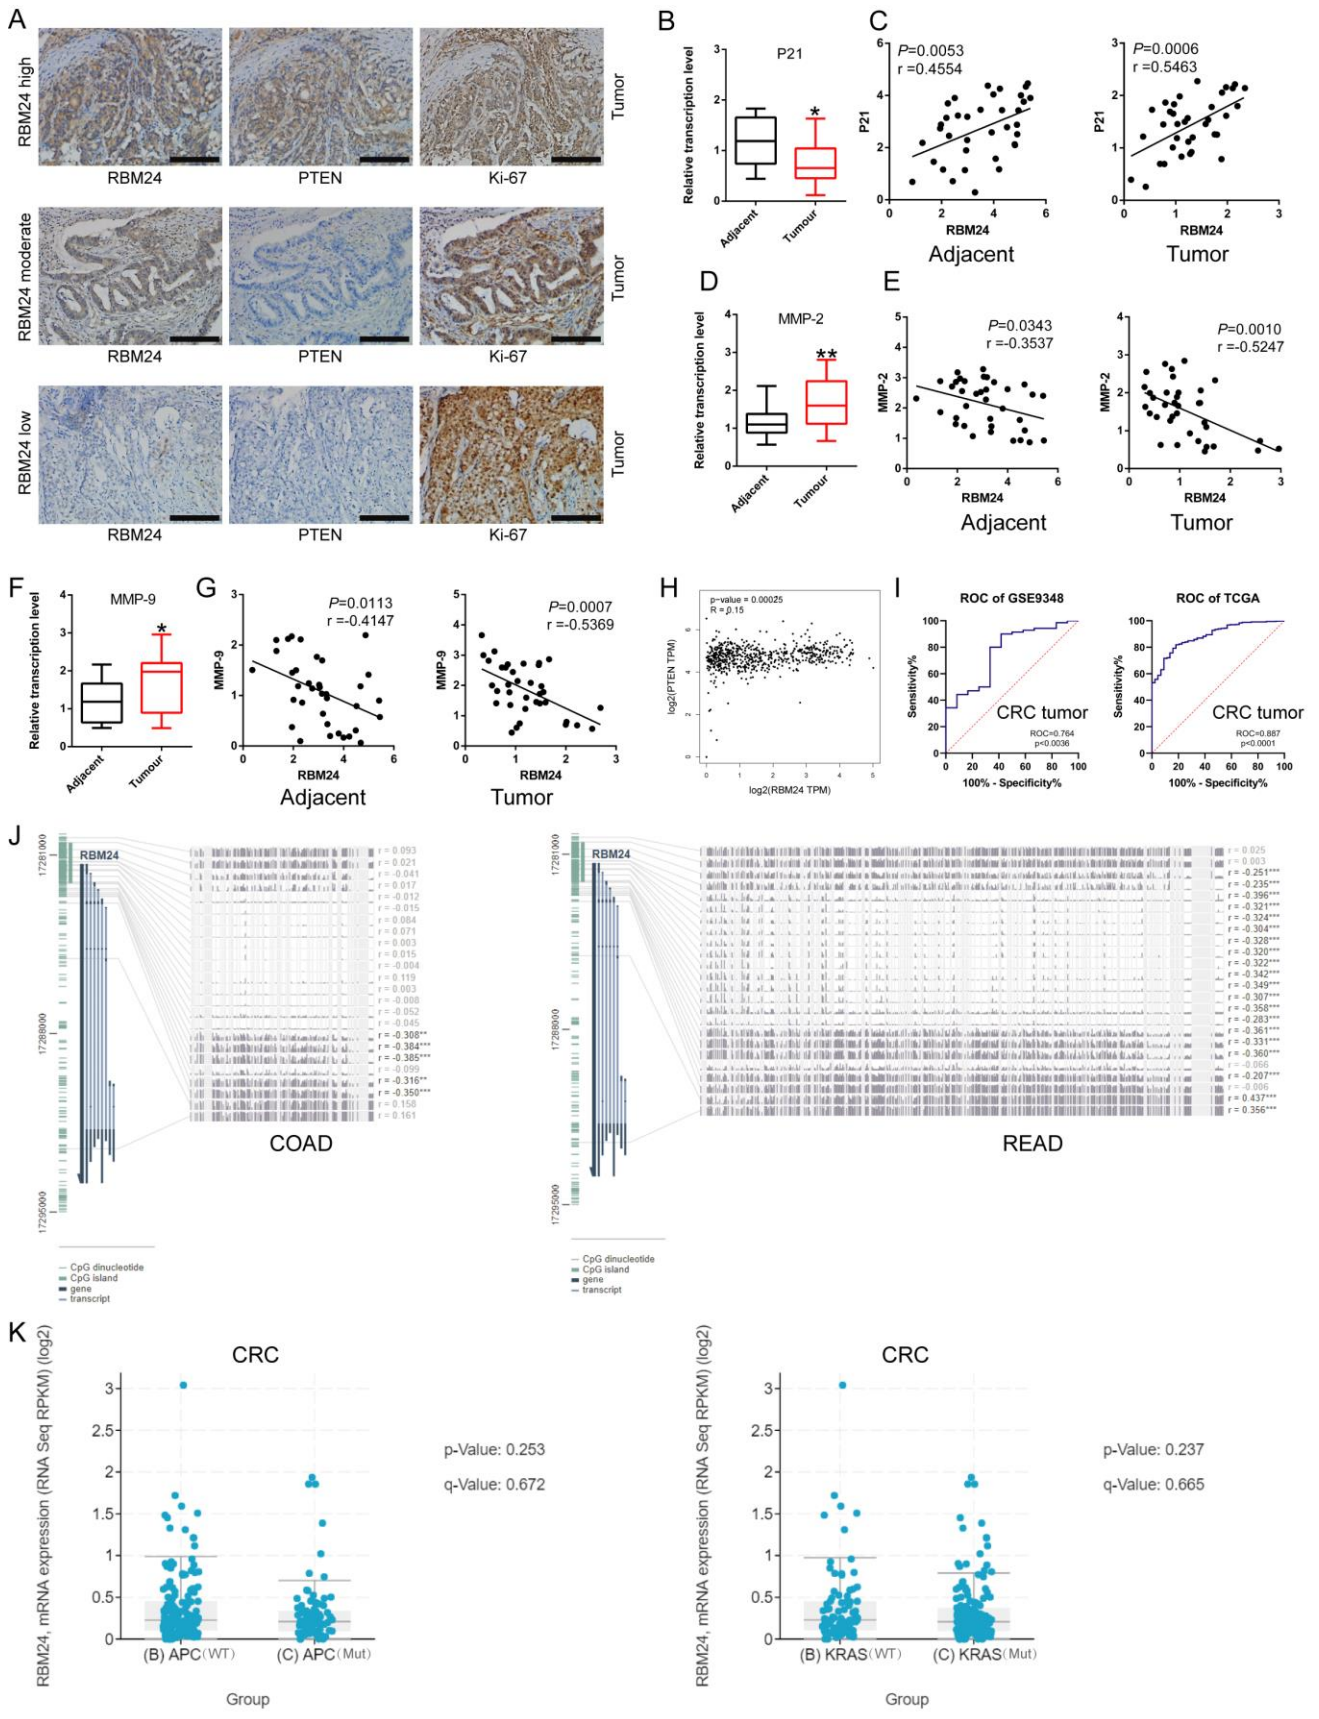

Supplement: CTM2-11-e383-s001.pdf [file CTM2-11-e383-s001.pdf]
